# Supplementary material for: Application and Effectiveness Analysis of DOPS in Pediatric Clinical Skills Teaching
Source: Research Square preprint supplement (doi:10.21203/rs.3.rs-6299626/v1), 2025-07-31
Supplement: Supplementary file 1 [file c9fce3e2b933fa92fb88180c.pdf]

## Survey of DOPS

|                                   |                                                                  |
|-----------------------------------|------------------------------------------------------------------|
| Question1                         | How helpful was DOPS to you? ( )                                 |
| A.Very helpful                    |                                                                  |
| B.Somewhat helpful                |                                                                  |
| C.Not very helpful                |                                                                  |
| D.Not helpful                     |                                                                  |
| Question2                         | Which part of DOPS impressed you the most? ( )                   |
| A.Preoperative preparation        |                                                                  |
| B.Physician-patient communication |                                                                  |
| C.Skill operation                 |                                                                  |
| D.Self-assessment & feedback      |                                                                  |
| Question3                         | Do you think DOPS is more effective than traditional methods?( ) |
| A.Completely agree                |                                                                  |
| B.Agree                           |                                                                  |
| C.Disagree                        |                                                                  |
| D.Completely disagree             |                                                                  |
| Question4                         | Would you like to continue using DOPS in the future?( )          |
| A.Very much looking forward       |                                                                  |
| B.Somewhat looking forward        |                                                                  |
| C.Not very eager                  |                                                                  |
| D.Not looking forward             |                                                                  |
| Question5                         | Teacher's feedback to improving your clinical skills? ( )        |
| A.Very helpful                    |                                                                  |
| B.Somewhat helpful                |                                                                  |
| C.Not very helpful                |                                                                  |
| D.Not helpful                     |                                                                  |
